# Supplementary material
Source: MDPI journal article supplement (https://www.mdpi.com/2079-6412/10/9/802)
Supplement: s1 [file s1]

# Supplementary Materials: Metallic Nanoparticle-Decorated Polydopamine Thin Films and Their Cell Proliferation Characteristics

Ferhunde Aysin <sup>1,2</sup>, Asli Yilmaz <sup>2,3</sup> and Mehmet Yilmaz <sup>2,4,5,\*</sup>

<sup>1</sup> Department of Biology, Ataturk University, 25240 Erzurum, Turkey; ferhundeaysin@gmail.com

<sup>2</sup> East Anatolia High Technology Application and Research Center (DAYTAM), Ataturk University, 25240 Erzurum, Turkey; asli.yilmaz@atauni.edu.tr

<sup>3</sup> Department of Molecular Biology and Genetics, Ataturk University, 25240 Erzurum, Turkey

<sup>4</sup> Department of Chemical Engineering, Ataturk University, 25240 Erzurum, Turkey

<sup>5</sup> Department of Nanoscience and Nanoengineering, Ataturk University, 25240 Erzurum, Turkey

\* Correspondence: nano.yilmaz@gmail.com

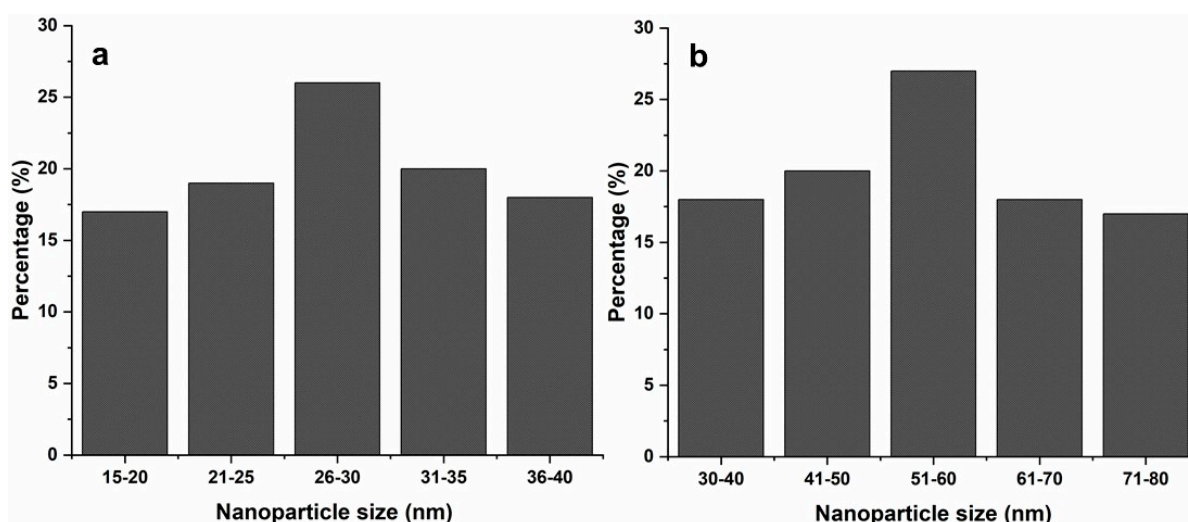

Figure S1. Nanoparticle size distribution of AuNPs (a), and AgNPs (b).

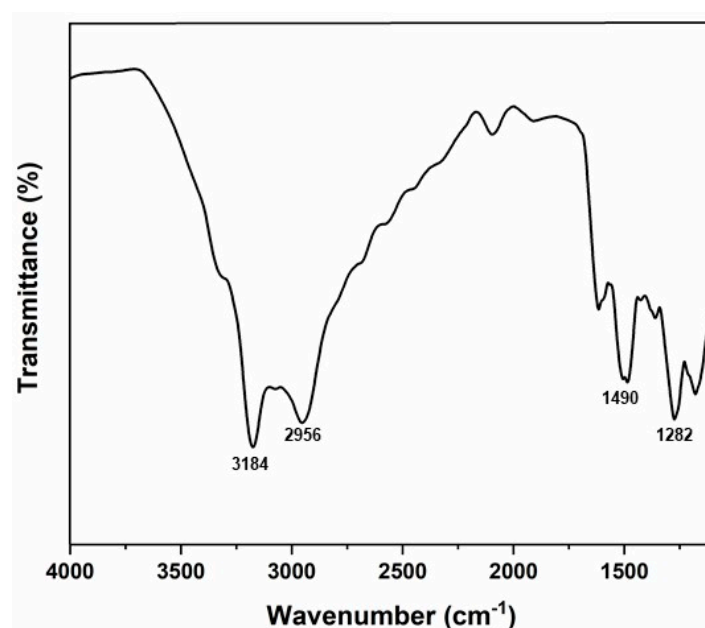

Figure S2. FT-IR spectrum of PDA thin film onto the glass slide.

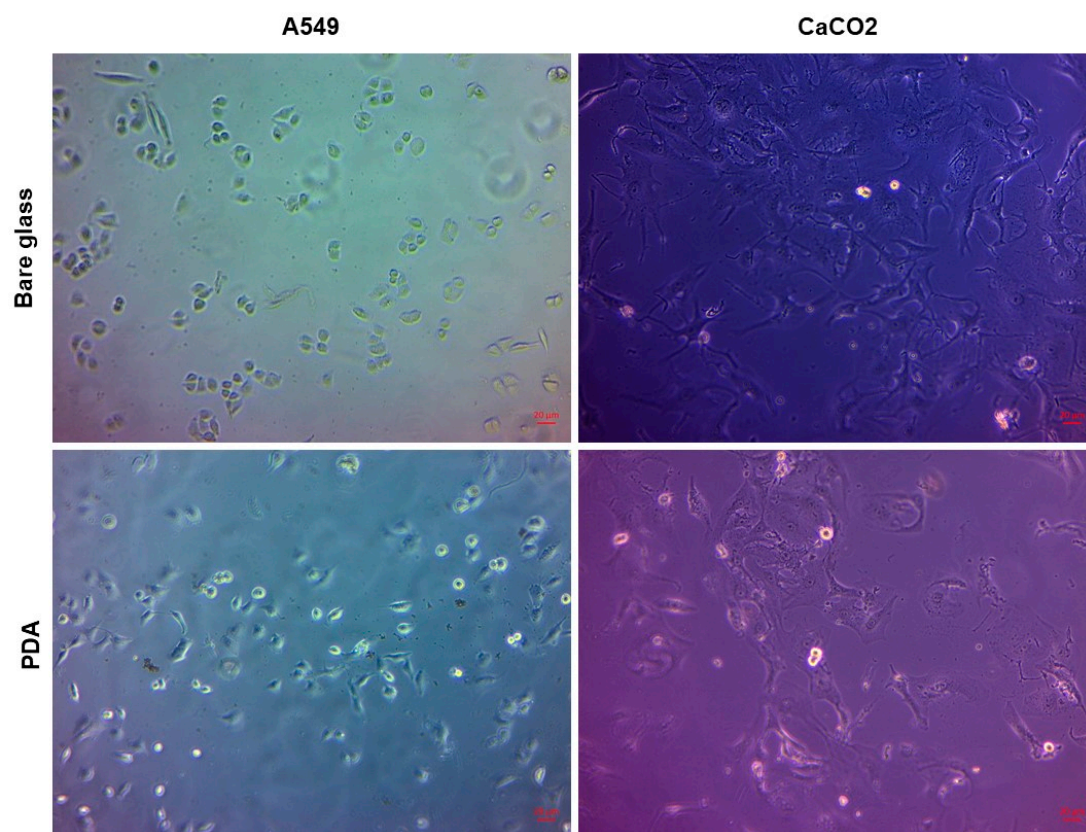

**Figure S3.** The preliminary study for the cell number optimization and optic images of A549 and CaCO<sub>2</sub> cell lines incubated with an initial cell number of 7500 cells per well onto the bare and PDA coated glass. Scale bars are 20 μm.



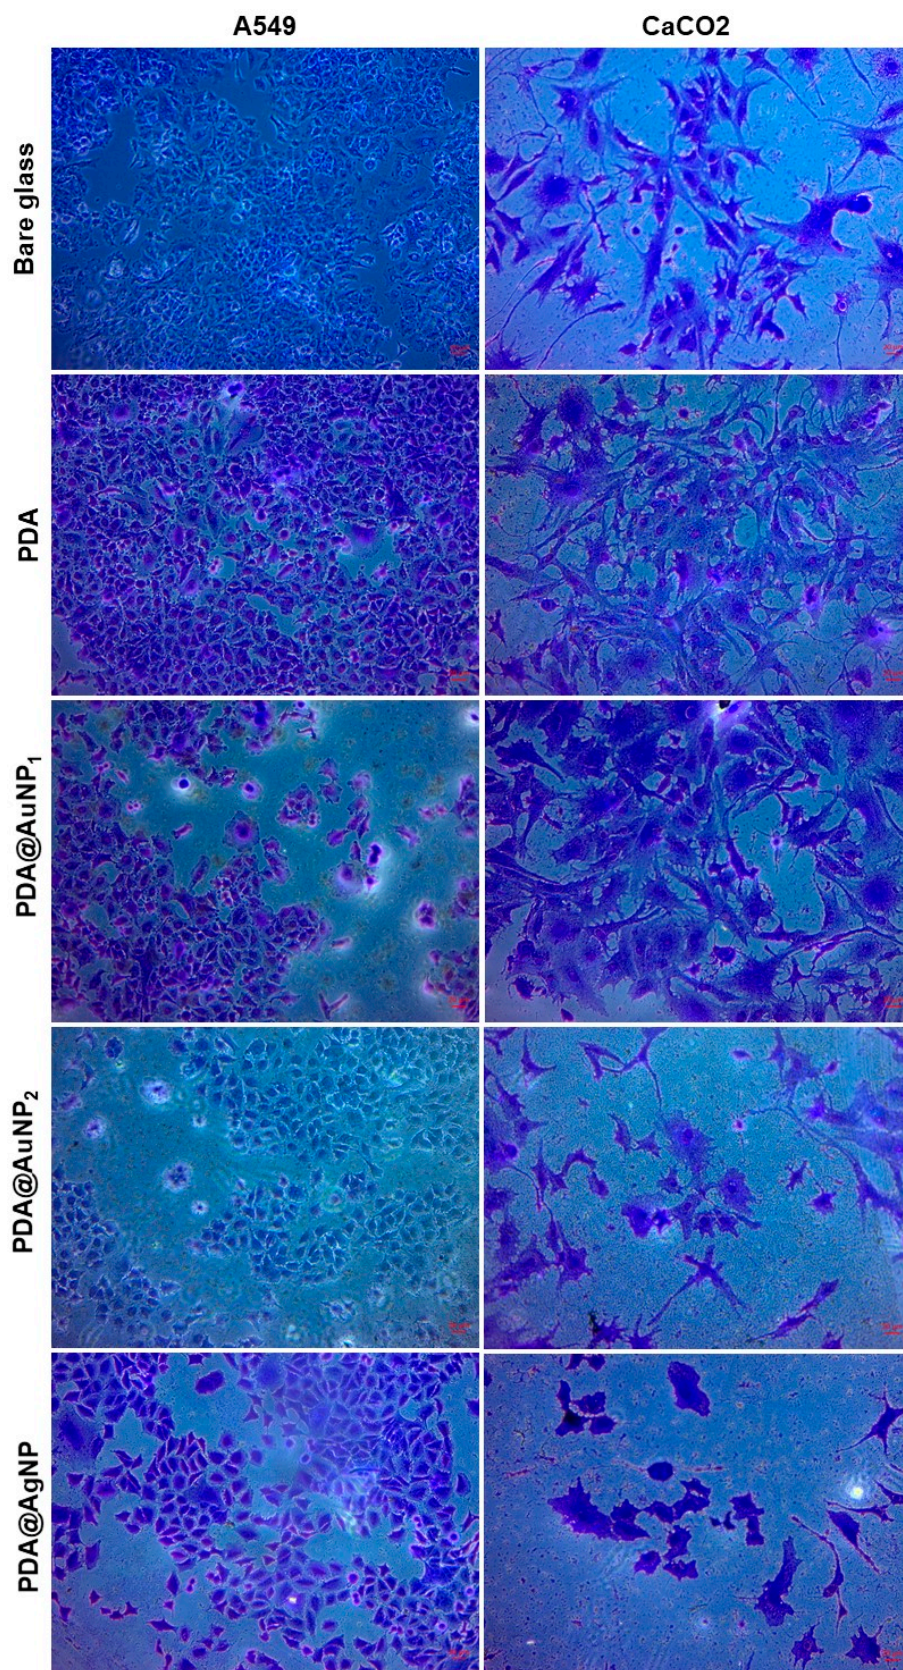

**Figure S4.** Violet staining of A549 and CaCO<sub>2</sub> cell lines onto different thin films at 20× magnification. Scale bars are 20  $\mu$ m.

**Table S1.** The number density of adhered cells onto the different substrates.

| Substrate           | Number of Adhered Cells (Cells/0.2 mm <sup>2</sup> ) |                   |
|---------------------|------------------------------------------------------|-------------------|
|                     | A549                                                 | CaCO <sub>2</sub> |
| Bare Glass          | 357 ± 21.64                                          | 74 ± 7,98         |
| PDA                 | 416 ± 22.31                                          | 91 ± 6,34         |
| PDA@Au <sub>1</sub> | 234 ± 14.17                                          | 89 ± 3,67         |
| PDA@Au <sub>2</sub> | 198 ± 10.76                                          | 54 ± 2,28         |
| PDA@Ag              | 176 ± 19,13                                          | 31 ± 5,39         |

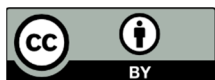

© 2020 by the authors. Licensee MDPI, Basel, Switzerland. This article is an open access article distributed under the terms and conditions of the Creative Commons Attribution (CC BY) license (<http://creativecommons.org/licenses/by/4.0/>).
